1 **The Effect of Incarceration on Tuberculosis Treatment Outcomes in Brazil: a**  
2 **Retrospective Cohort Study**

3

4

5 Jamieson O'Marr<sup>1</sup>, Crhistinne Gonçalves<sup>2</sup>, Denise Arakaki-Sanchez<sup>3</sup>, Daniele Maria Pelissari  
6 PhD<sup>3</sup>, Fernanda Dockhorn Costa<sup>3</sup>, Julio Croda<sup>2,4,5\*</sup>, Katharine S. Walter<sup>6\*</sup>, Jason R. Andrews<sup>6\*</sup>

7

8 1. Yale School of Medicine, New Haven, CT, USA

9 2. Federal University of Mato Grosso do Sul, School of Medicine, Campo Grande, MS, Brazil

10 3. National Tuberculosis Control Program, Brasília, DF, Brazil

11 4. Oswaldo Cruz Foundation, Public Health, Campo Grande, MS, Brazil

12 5. Department of Epidemiology of Microbial Diseases, Yale School of Public Health, New  
13 Haven, CT, USA

14 6. Department of Medicine, Stanford University School of Medicine, Stanford, CA, USA

15 \*Contributed equally

16

17

18 Running Head: Incarceration and TB outcomes in Brazil

19

20

21 Article Word Count: 2491

22 No. of references: 27

23 No. of Tables: 3

24 No of Figures: 2

25

26

27 Keywords: tuberculosis; incarceration; treatment outcomes; DOTS

28

29

30 Correspondence:

31 Jamieson O'Marr

32 Yale School of Medicine

33 333 Cedar St

34 New Haven CT, USA, 06510

35 Email: jamiesonomarr@gmail.com

36

37

38

39 **Abstract**

40

41 **Background:** Tuberculosis notifications in Latin American prisons have more than doubled over  
42 the past two decades; however, treatment outcomes and their determinants among incarcerated  
43 individuals in this region are not well understood.

44

45 **Methods:** Newly diagnosed drug-susceptible tuberculosis cases reported to Brazil's Sistema de  
46 Informação de Agravos de Notificação (SINAN) between January 2015 and December 2017  
47 were included. Multivariate logistic regression was used to assess socioeconomic and clinical  
48 factors associated with treatment success among incarcerated individuals.

49

50 **Results:** Incarcerated individuals (n=17,776) had greater treatment success than non-incarcerated  
51 individuals (n=160,728; 82.2% vs 75.1%,  $p<0.0001$ ), including after adjusting for demographic  
52 and clinical risk factors (adjusted Odds Ratio [aOR]: 1.27; 95% CI: 1.19-1.34). These differences  
53 were partially mediated by increased use of directly observed therapy among incarcerated  
54 individuals (DOT) (61% vs 47%,  $p<0.001$ ), which was associated with greater efficacy in the  
55 incarcerated population (aOR 2.56 vs aOR 2.17;  $p<0.001$ ). DOT was associated with improved  
56 treatment success among incarcerated subpopulations at elevated risk of poor outcomes.

57

58 **Conclusion:** Tuberculosis treatment success among incarcerated individuals in Brazil is higher  
59 than non-incarcerated individuals, but both fall below WHO targets. Expanding the use of DOT  
60 and services for socially and medically vulnerable individuals may improve outcomes in carceral  
61 settings.

62

63 **Article**

64 **INTRODUCTION**

65 Tuberculosis remains one of the leading causes of death by an infectious disease. In 2019,  
66 there were an estimated 10 million cases with approximately 1.2 million deaths among HIV-  
67 negative individuals and an additional 250,000 deaths among HIV co-infected individuals<sup>1</sup>. The  
68 World Health Organization (WHO) has identified 30 countries with the highest burden of  
69 tuberculosis, where 87% of the world's new tuberculosis cases occurred in 2019<sup>1</sup>. Brazil remains  
70 the only country within the Americas within this group.

71 The incidence of tuberculosis in Brazil has slowly declined over the last 20 years,  
72 although in the last three years there has been a modest increase<sup>2</sup>. This trend has been part of a  
73 troubling rise in tuberculosis cases across Central and South America in recent years<sup>3</sup>. The rate  
74 of incarceration in Central and South America has increased more than 206% since 2000 while  
75 tuberculosis cases among incarcerated individuals have increased by an even larger amount<sup>3-7</sup>.  
76 Incarcerated individuals represent a disproportionate and growing proportion of the total  
77 tuberculosis cases across Central and South America. The higher prevalence of HIV, smoking,  
78 alcohol and illicit drug use among incarcerated populations, together with increased risk of  
79 infection and deficiencies in health facilities, pose threats to the successful treatment of  
80 tuberculosis in correctional settings<sup>4,8,9</sup>.

81 There are few published studies examining tuberculosis treatment outcomes in  
82 correctional facilities in the Americas, and the factors associated with poor outcomes in these  
83 settings are not well understood. Understanding these factors well and addressing them will be  
84 important for controlling tuberculosis both within incarcerated populations and surrounding

85 communities. We used Brazil's national tuberculosis registry to measure the effect of  
86 incarceration on tuberculosis treatment outcomes and identify risk factors for lack of tuberculosis  
87 treatment success among Brazil's growing incarcerated population.

88

## 89 **METHODS**

### 90 *Study Design and Participants*

91 We conducted a retrospective cohort study of tuberculosis cases reported to Brazil's  
92 national notifiable disease system, Sistema de Informação de Agravos de Notificação (SINAN),  
93 from January 2015 through December 2017. All individuals diagnosed with tuberculosis in  
94 Brazil are mandatorily reported to SINAN<sup>10,11</sup>. SINAN reports tuberculosis treatment outcome at  
95 the completion of treatment as cure, lost to follow-up, death from tuberculosis, death from other  
96 causes, transfer, diagnostic change, drug-resistant tuberculosis, change in treatment regimen, and  
97 therapeutic failure.

98 We excluded patients with a change in diagnosis and those who did not have a reported  
99 treatment outcome. Patients who were found to have multidrug-resistant tuberculosis (MDR-TB)  
100 cases at diagnosis were also excluded because MDR-TB treatment outcomes are reported in a  
101 separate database. MDR-TB cases were defined as those individuals whose *M. tuberculosis*  
102 isolate was resistant to isoniazid and rifampin at the time of diagnosis. Additionally, we excluded  
103 cases without a reported incarceration status and limited our analysis to only new identified  
104 tuberculosis cases due to differing treatment outcome definitions among retreatment tuberculosis  
105 cases. Race is a self-reported variable within SINAN with five established survey categories:  
106 black, brown or mixed race, white, Asian, and indigenous.

107

## 108 *Outcomes and Definitions*

109           We defined treatment success as cases reported as “cure” in SINAN. The Brazilian  
110 National Tuberculosis Program defines cure as two negative sputum smears at the end of therapy  
111 or the completion of treatment with no evidence of failure and clinical and radiological criteria in  
112 individuals without a sputum smear test. In our models, we defined lack of treatment success as  
113 lost to follow-up, death due to tuberculosis, death due to other causes, therapeutic failure  
114 (including MDR diagnosis after treatment), or transfer. We included all newly reported  
115 tuberculosis cases among people above the age of 18 at diagnosis with complete information for  
116 incarceration status and treatment outcome.

117           In addition to the treatment outcome, the following variables were extracted from  
118 SINAN: 1) incarceration status at the time of tuberculosis notification, 2) sex, 3) age at  
119 diagnosis, 4) year of diagnosis, 5) self-reported race, 6) education level, 7) received directly  
120 observed therapy (at least 3 weekly assisted doses throughout the treatment course), 8) alcohol  
121 use disorder, 9) HIV status, 10) diabetes status, 11) presence of a mental health condition, 12)  
122 clinical form of tuberculosis 13) Brazilian state of diagnosis. The clinical variables of alcohol use  
123 disorder, diabetes, and presence of a mental health condition are determined and reported by the  
124 healthcare worker notifying the case to SINAN at the time of diagnosis.

125

## 126 *Statistical Analysis*

127           Data analysis was conducted in R (version 3.5.3) and R Studio (version 1.2.1335).  
128 Missingness was under 10% for the majority of the variables included in our analysis and  
129 covariates with missingness greater than 30% were excluded. To address missingness in

130 measured covariates, we employed multiple imputation for race, education level, directly  
131 observed therapy (DOT), HIV status, alcohol use disorder, diabetes, and the presence of a mental  
132 health condition using the mice package in R<sup>12,13</sup>.

133 We compared our outcomes and extracted demographic and clinical variables between  
134 the non-incarcerated and incarcerated population with chi-squared statistics. We tested the effect  
135 of clinical and sociodemographic variables on tuberculosis treatment outcome with mixed effects  
136 multivariable logistic regression including incarceration status, DOT, sex, self-reported race, age  
137 strata, year of diagnosis, education level, HIV status, alcohol use disorder, diabetes, mental  
138 health condition, and form of tuberculosis with state included as a random effect. These variables  
139 were selected based on previous studies and subject level knowledge of factors that affect  
140 tuberculosis treatment outcomes. We included a multiplicative interaction between DOT and  
141 incarceration to assess for any relationship between these two variables. Odds ratios with 95%  
142 confidence intervals were reported. To investigate the relationship between the predictors in the  
143 above model more specifically among the incarcerated population, a multivariable logistic  
144 regression was employed.

145

#### 146 *Ethics Statement*

147 This study was approved by the IRB at Stanford University (Protocol #50466) and the IRB at the  
148 Universidade Federal Do Mato Grosso Do Sul (Protocol #20531819.5.0000.0021).

149

## 150 **RESULTS**

151 A total of 178,504 new tuberculosis cases were reported to Brazil's national tuberculosis  
152 registry between 2015 and 2017. Among those, 17,776 (9.96%) individuals were incarcerated at

153 the time of diagnosis. The overwhelming majority of cases notified in the incarcerated  
154 population occurred among men (96.4%), compared to 66.2% of cases notified in the general  
155 population ( $\chi^2$  test,  $p < 0.0001$ ). The proportion of individuals with tuberculosis who were HIV  
156 co-infected was lower among the incarcerated population than the general population (6.4% vs  
157 11.1%;  $p < 0.0001$ ), as was the percentage of patients with reported alcohol use disorder (12.7%  
158 vs 18.6%,  $p < 0.001$ ). Incarcerated individuals were younger (30.4 vs 42.7 years,  $p < 0.0001$ ) and  
159 were more likely to be treated under DOT than non-incarcerated individuals (61.0% vs 47.4%,  
160  $p < 0.0001$ ).

161 135,238 (75.8%) were considered to have treatment success, 18,261 (10.2%) lost to  
162 follow-up, 5,714 (3.2%) died of tuberculosis, 8,175 (4.6%) died by other causes, 9,254 (5.2%)  
163 transferred from the program, 730 (0.4%) were subsequently diagnosed with drug-resistant  
164 tuberculosis after a trial of therapy, 1,012 (0.6%) changed treatment regimen, and 120 (0.07%)  
165 experienced therapeutic failure. Treatment success was higher among incarcerated individuals  
166 compared with the general population (82.2% vs 75.1%,  $p < .0001$ ). Notable differences in the  
167 remaining treatment outcomes between the incarcerated and non-incarcerated populations was a  
168 lower rate of death by tuberculosis (0.9% vs 3.5%;  $p < 0.0001$ ), death by other causes (1.3% vs  
169 4.9%;  $p < .0001$ ) and lost to follow-up (8.5% vs 10.4%;  $p < 0.0001$ ).

170 In a multivariable model, incarceration at the time of tuberculosis notification was  
171 associated with an increased odds of treatment success (Table 2; aOR: 1.26; 95% CI: 1.19-1.34).  
172 DOT was also strongly associated with treatment success (aOR: 2.16; 95% CI: 2.11-2.22). We  
173 also found a significant interaction between incarceration and DOT (aOR: 1.18; 95% CI: 1.09-  
174 1.28), suggesting that DOT has a greater positive impact on treatment success among the  
175 incarcerated population compared to the general population. Factors that were negatively

176 associated with treatment success in the entire cohort included HIV co-infection (aOR: 0.33;  
177 95% CI: 0.32-0.34), reported alcohol use disorder (aOR: 0.55; 95% CI: 0.54-0.57), age greater  
178 than 65 years (aOR: 0.71; 95% CI: 0.68-0.75) and self-reported non-white race (black, aOR:  
179 0.80; 95% CI 0.75-0.84; mixed race, aOR: 0.81; 95% CI: 0.79-0.84; Asian, aOR: 0.83; 95% CI:  
180 0.73-0.94).

181 In a multivariable model among only incarcerated individuals, DOT (Table 3; aOR: 2.50;  
182 95% CI: 2.31-2.71) and having completed a high school education (aOR: 1.77; 95% CI: 1.58-  
183 1.97) were positively associated with treatment success. We additionally identified several  
184 factors associated with lower treatment success within this population. These included a non-  
185 white race (black, aOR: 0.83; 95% CI: 0.72-0.94; mixed race, aOR: 0.75; 95% CI: 0.69-0.82;  
186 indigenous, aOR: 0.49; 95% CI 0.29-0.82), HIV infection (aOR: 0.39; 95% CI: 0.34-0.45),  
187 reported alcohol use disorder (aOR: 0.63; 95% CI: 0.57-0.70), a diagnosed mental health  
188 condition (aOR: 0.60; 95% CI: 0.46-0.80), and being over the age of 65 (aOR: 0.46; 95% CI:  
189 0.33-0.65).

190 Using predicted probabilities from our multivariable model among incarcerated  
191 individuals, we demonstrate that DOT was associated with increased treatment success across a  
192 number of important predictors including age, self-reported race, sex, alcohol use disorder,  
193 education level, and HIV status (Figure 1). Individuals with risk factors associated with lower  
194 probability of treatment success had substantially improved outcomes when treated with DOT,  
195 with most subpopulations having an estimated treatment success probability above 85%. Use of  
196 DOT among incarcerated populations varied substantially across Brazil, ranging from 0% of  
197 incarcerated patients uncovered by DOT in the state of Amapá (n = 47) to as many as 89% of  
198 incarcerated patients not utilizing DOT in the state of Rondônia (n = 238) (Figure 2). In total, 8



199 out of Brazil's 27 states had over half of their incarcerated population not using DOT, leaving  
200 the national average DOT coverage among incarcerated patients at 61%. The states with the  
201 largest population of incarcerated individuals not utilizing DOT during tuberculosis treatment  
202 were São Paulo (n=2,589), Rio Grande do Sul (n=946), and Rio de Janeiro (n=658).

203

204

## 205 **DISCUSSION**

206 Tuberculosis notifications have been rising steeply in prisons in Latin America, largely  
207 driven by increasing rates of incarceration<sup>3</sup>. However, the impact of incarceration on tuberculosis  
208 treatment outcomes and risk factors for treatment failure within prisons have only begun to be  
209 identified. Drawing upon Brazil's national tuberculosis notification system, we found that  
210 incarceration at the time of tuberculosis diagnosis was associated with higher rates of treatment  
211 success compared with the general population. Use of DOT was greater in prisons than the  
212 community and was the strongest predictor of tuberculosis treatment success among incarcerated  
213 individuals. However, the proportion of individuals achieving treatment success in prisons (82%)  
214 and the general population (75%) do not meet the World Health Organization's END-TB  
215 Strategy 2025 target of 90% treatment success<sup>1</sup>. Among incarcerated individuals, we identified  
216 several risk factors and demographic groups in whom treatment outcomes are particularly poor  
217 which could inform the development of targeted services and interventions to reduce disparities  
218 and improve outcomes.

219 Our study explored DOT and its relationship to overall treatment success, finding that  
220 DOT is strongly associated with better treatment outcomes for all tuberculosis patients. Our  
221 analysis also explored the interaction between DOT and incarceration status and demonstrated a  
222 significant positive interaction, which underscores the particular importance of DOT for the  
223 incarcerated population. Previous literature surrounding DOT has shown mixed efficacy<sup>13</sup>,  
224 particularly in correctional settings, however our findings add to the work by Macedo et al. and  
225 others which demonstrate a similar beneficial effect of DOT on treatment outcomes among  
226 incarcerated individuals in Brazil<sup>14-16</sup>. The usage of DOT within the carceral setting poses  
227 unique challenges; however, the observed ability of certain states to employ DOT among nearly

228 all incarcerated tuberculosis patients indicate that it is possible. The skills and strategies for the  
229 effective employment of DOT therapy require further study as it has the potential to improve  
230 population-level tuberculosis treatment outcomes within Brazilian prisons and in the general  
231 population.

232 Our finding of increased odds of treatment success with incarceration is consistent with  
233 previous studies of incarcerated individuals. These studies demonstrate that diagnosing and  
234 treating tuberculosis during incarceration, and other infectious diseases such as HIV, may, in  
235 some circumstances, improve treatment outcomes due to increased access to medical care during  
236 incarceration amongst populations systematically excluded from care<sup>17,22</sup>. However, these studies  
237 also find that transitions of care, such as the kinds that result from transfer within a penal system  
238 or release, often result in poorer overall outcomes in incarcerated individuals<sup>17,19–22</sup>. Further  
239 studies are needed to investigate outcomes of tuberculosis treatment among individuals who are  
240 receiving therapy at the time of release from prison.

241 Previous studies have identified racial disparities in tuberculosis treatment outcomes in  
242 the general population in Brazil.<sup>8,23,25</sup> We found that such disparities also exist among  
243 incarcerated individuals. Adjusting for multiple other demographic and clinical attributes, black  
244 incarcerated individuals had nearly 20% lower adjusted odds of treatment success than white  
245 incarcerated individuals. Whether this disparity is due to delays in diagnoses, differences in  
246 treatment or other factors is not clear from the available data, and further studies are needed to  
247 understand the determinants of these disparities so that they can be effectively addressed.

248 Additional factors that were associated with worse outcomes were alcohol use disorder  
249 and HIV positive status, both of which are well-documented predictors for poor treatment  
250 outcomes<sup>14</sup>. Finally, other studies have identified the importance of social, educational, and

251 economic support with improved tuberculosis treatment outcomes, something our proxy of  
252 education level also supports<sup>17,19</sup>.

253         While we investigated a large, quality-controlled national tuberculosis registry, our  
254 findings have several limitations. First, Brazil's tuberculosis registry had varying levels of data  
255 missingness for several variables. Certain important covariates for treatment success, such as  
256 smoking, were missing in more than half of notified cases and had to be excluded. For covariates  
257 with less than 30% of observations missing, we used multiple imputation to handle missingness.  
258 Another limitation was the lack of standardized screens for clinical covariates such as diabetes,  
259 mental health disease, and alcohol use disorder. These determinations were made at the time of  
260 diagnosis and thus could be susceptible to bias and underdiagnosis—potentially substantially.  
261 Additionally, SINAN lacks economic indicators, limiting us to only education as a social  
262 indicator. Due to significant reporting changes in the national tuberculosis registry made in 2015,  
263 we could only examine cases from 2015 through 2017. While drug-resistant tuberculosis  
264 epidemics in prisons have posed major challenges in many parts of the world, in Brazil, <0.4%  
265 of tuberculosis cases in our study were multidrug-resistant which concurs with previous findings  
266 by Macedo et al.<sup>14</sup>. Nevertheless, further studies are needed to characterize risk factors for  
267 treatment success for multi-drug resistant tuberculosis in correctional settings in Brazil. Despite  
268 these limitations, our study utilized a large national surveillance system that enabled a robust  
269 evaluation of the covariates associated with treatment success in Brazilian prisons.

270         There is an urgent need to identify robust strategies for prompt diagnosis and effective  
271 treatment to address the increasing burden of tuberculosis in prisons in Brazil and across the  
272 Americas. While treatment success rates in prisons exceed those of the general population in  
273 Brazil, there remains substantial room for improvement, particularly among vulnerable

274 incarcerated populations. Our findings suggest that tuberculosis treatment success can be  
275 improved through expanding the use of DOT, particularly for incarcerated sub-populations at the  
276 highest risk of poor outcomes.

277

278

## 279 **References**

- 280 1. World Health Organization. Global Tuberculosis Report 2020. 2020.
- 281 2. World Health Organization. Tuberculosis Profile: Brazil [Internet]. Available from:  
282 [https://worldhealthorg.shinyapps.io/tb\\_profiles/?\\_inputs\\_&lan=%22EN%22&iso2=%22BR](https://worldhealthorg.shinyapps.io/tb_profiles/?_inputs_&lan=%22EN%22&iso2=%22BR%22&main_tabs=%22est_tab%22)  
283 [%22&main\\_tabs=%22est\\_tab%22](https://worldhealthorg.shinyapps.io/tb_profiles/?_inputs_&lan=%22EN%22&iso2=%22BR%22&main_tabs=%22est_tab%22)
- 284 3. Walter KS, Martinez L, Arakaki-Sanchez D, Sequera VG, Estigarribia Sanabria G, Cohen T, et  
285 al. The escalating tuberculosis crisis in central and South American prisons. *The Lancet*.  
286 2021 Apr;S0140673620325782.
- 287 4. Carbone A da SS, Paião DSG, Sgarbi RVE, Lemos EF, Cazanti RF, Ota MM, et al. Active and  
288 latent tuberculosis in Brazilian correctional facilities: a cross-sectional study. *BMC Infect*  
289 *Dis*. 2015 Dec;15(1):24.
- 290 5. Bourdillon PM, Gonçalves CCM, Pelissari DM, Arakaki-Sanchez D, Ko AI, Croda J, et al.  
291 Increase in Tuberculosis Cases among Prisoners, Brazil, 2009–20141. *Emerging Infectious*  
292 *Diseases*. 2017 Mar;23(3):496–9.
- 293 6. Paião DSG, Lemos EF, Carbone A da SS, Sgarbi RVE, Junior AL, da Silva FM, et al. Impact of  
294 mass-screening on tuberculosis incidence in a prospective cohort of Brazilian prisoners.  
295 *BMC Infect Dis*. 2016 Dec;16(1):533.
- 296 7. Broach S, Petrone M, Ryan J, Sivram A. Reservoirs of Injustice: How incarceration for drug-  
297 related offenses fuels the spread of tuberculosis in Brazil.
- 298 8. Basu S, Stuckler D, McKee M. Addressing Institutional Amplifiers in the Dynamics and  
299 Control of Tuberculosis Epidemics. *The American Journal of Tropical Medicine and*  
300 *Hygiene*. 2011 Jan 5;84(1):30–7.
- 301 9. Sánchez A, Huber FD, Massari V, Barreto A, Camacho LAB, Cesconi V, et al. Extensive  
302 *Mycobacterium tuberculosis* circulation in a highly endemic prison and the need for urgent  
303 environmental interventions. *Epidemiol Infect*. 2012 Oct;140(10):1853–61.
- 304 10. Brasil Ministério da Saúde. Manual de Recomendações para o Controle da Tuberculose no  
305 Brasil. 2019;366.
- 306 11. Silva GDM da, Bartholomay P, Cruz OG, Garcia LP. Avaliação da qualidade dos dados,  
307 oportunidade e aceitabilidade da vigilância da tuberculose nas microrregiões do Brasil.  
308 *Ciênc saúde coletiva*. 2017 Oct;22(10):3307–19.
- 309 12. Buuren S van, Groothuis-Oudshoorn K. MICE: Multivariate Imputation by Chained Equations  
310 in R. *J Stat Soft* [Internet]. 2011 [cited 2020 Jul 20];45(3). Available from:  
311 <http://www.jstatsoft.org/v45/i03/>

- 312 13. Karumbi J, Garner P. Directly observed therapy for treating tuberculosis. Cochrane  
313 Infectious Diseases Group, editor. Cochrane Database of Systematic Reviews [Internet].  
314 2015 May 29 [cited 2021 Jul 20]; Available from:  
315 <https://onlinelibrary.wiley.com/doi/10.1002/14651858.CD003343.pub4>
- 316 14. Macedo LR, Reis-Santos B, Riley LW, Maciel EL. Treatment outcomes of tuberculosis  
317 patients in Brazilian prisons: a polytomous regression analysis. 2013;9.
- 318 15. Macedo LR, Maciel ELN, Struchiner CJ. Factors associated with tuberculosis in persons  
319 deprived of liberty in Espírito Santo. 2020;12.
- 320 16. Prado TN do, Rajan JV, Miranda AE, Dias E dos S, Cosme LB, Possuelo LG, et al. Clinical and  
321 epidemiological characteristics associated with unfavorable tuberculosis treatment  
322 outcomes in TB-HIV co-infected patients in Brazil: a hierarchical polytomous analysis. The  
323 Brazilian Journal of Infectious Diseases. 2017 Mar;21(2):162–70.
- 324 17. Baillargeon J. Accessing Antiretroviral Therapy Following Release From Prison. JAMA. 2009  
325 Feb 25;301(8):848.
- 326 18. Singano V, Kip E, Ching'ani W, Chiwaula L. Tuberculosis treatment outcomes among  
327 prisoners and general population in Zomba, Malawi. BMC Public Health. 2020  
328 Dec;20(1):700.
- 329 19. Palepu A, Tyndall MW, Chan K, Wood E, Montaner JS, Hogg RS. Initiating highly active  
330 antiretroviral therapy and continuity of HIV care: the impact of incarceration and prison  
331 release on adherence and HIV treatment outcomes. :8.
- 332 20. Mabud TS, de Lourdes Delgado Alves M, Ko AI, Basu S, Walter KS, Cohen T, et al. Evaluating  
333 strategies for control of tuberculosis in prisons and prevention of spillover into  
334 communities: An observational and modeling study from Brazil. Metcalfe JZ, editor. PLoS  
335 Med. 2019 Jan 24;16(1):e1002737.
- 336 21. Schwitters A, Kaggwa M, Omiel P, Nagadya G, Kisa N, Dalal S. Tuberculosis incidence and  
337 treatment completion among Ugandan prison inmates. 2016;11.
- 338 22. Adane K. Tuberculosis treatment outcome and predictors in northern Ethiopian prisons: a  
339 five-year retrospective analysis. 2018;8.
- 340 23. Eshetie S, Gizachew M, Alebel A, van Soolingen D. Tuberculosis treatment outcomes in  
341 Ethiopia from 2003 to 2016, and impact of HIV co-infection and prior drug exposure: A  
342 systematic review and meta-analysis. Subbian S, editor. PLoS ONE. 2018 Mar  
343 19;13(3):e0194675.
- 344 24. Thomas BE, Thiruvengadam K, S. R, Kadam D, Ovung S, Sivakumar S, et al. Smoking, alcohol  
345 use disorder and tuberculosis treatment outcomes: A dual co-morbidity burden that  
346 cannot be ignored. Glantz SA, editor. PLoS ONE. 2019 Jul 31;14(7):e0220507.

- 347 25. Ali MK, Karanja S, Karama M. Factors associated with tuberculosis treatment outcomes  
348 among tuberculosis patients attending tuberculosis treatment centres in 2016-2017 in  
349 Mogadishu, Somalia. 2018;14.
- 350 26. Andrade KVF de, Nery JS, Souza RA de, Pereira SM. Effects of social protection on  
351 tuberculosis treatment outcomes in low or middle-income and in high-burden countries:  
352 systematic review and meta-analysis. *Cad Saúde Pública* [Internet]. 2018 Feb 5 [cited 2020  
353 Dec 14];34(1). Available from:  
354 [http://www.scielo.br/scielo.php?script=sci\\_arttext&pid=S0102-](http://www.scielo.br/scielo.php?script=sci_arttext&pid=S0102-311X2018000102001&lng=en&tlng=en)  
355 [311X2018000102001&lng=en&tlng=en](http://www.scielo.br/scielo.php?script=sci_arttext&pid=S0102-311X2018000102001&lng=en&tlng=en)
- 356 27. Durovni B, Saraceni V, Puppini MS, Tassinari W, Cruz OG, Cavalcante S, et al. The impact of  
357 the Brazilian Family Health Strategy and the conditional cash transfer on tuberculosis  
358 treatment outcomes in Rio de Janeiro: an individual-level analysis of secondary data.  
359 *Journal of Public Health*. 2018 Sep 1;40(3):e359–66.
- 360  
361  
362



363 **Table 1.** Sociodemographic and clinical characteristics of new Brazilian TB patients from 2015-  
364 2017 after imputation, by incarceration status.

|                              | Cohort                               |                                 | P value |
|------------------------------|--------------------------------------|---------------------------------|---------|
|                              | Non-Incarcerated (%)<br>(N = 160728) | Incarcerated (%)<br>(N = 17776) |         |
| Sex                          |                                      |                                 | < .001  |
| Men                          | 106516 (66.2)                        | 17134 (96.4)                    |         |
| Women                        | 54212 (33.8)                         | 642 (3.4)                       |         |
| Mean age (years)             | 42.7                                 | 30.4                            | < .001  |
| 18-25                        | 27793 (17.3)                         | 6809 (38.3)                     | < .001  |
| 26-45                        | 66979 (41.7)                         | 9753 (54.9)                     |         |
| 46-65                        | 49552 (30.8)                         | 1041 (5.8)                      |         |
| > 65                         | 16404 (10.2)                         | 173 (1.0)                       |         |
| Self-Reported Race           |                                      |                                 | < .001  |
| white                        | 56680 (35.3)                         | 6250 (35.2)                     |         |
| black                        | 21341 (13.2)                         | 2171 (12.2)                     |         |
| Asian                        | 1297 (0.8)                           | 164 (0.9)                       |         |
| brown/mixed Race             | 79662 (49.6)                         | 9103 (51.2)                     |         |
| indigenous                   | 1740 (1.1)                           | 88 (0.5)                        |         |
| Education (years)            |                                      |                                 | < .001  |
| Less than 5th Grade          | 48222 (30.0)                         | 4439 (25.0)                     |         |
| 5th - 8th Completed          | 49177 (30.5)                         | 8400 (47.3)                     |         |
| Greater than 8th Completed   | 63318 (39.5)                         | 4937 (27.7)                     |         |
| Directly Observed Therapy    | 76124 (47.4)                         | 10844 (61.0)                    | < .001  |
| Comorbidities                |                                      |                                 |         |
| Alcohol Use Disorder         | 29836 (18.6)                         | 2265 (12.7)                     | < .001  |
| HIV Positive                 | 17918 (11.1)                         | 1145 (6.4)                      | < .001  |
| Diabetes                     | 14838 (9.2)                          | 304 (1.7)                       | < .001  |
| Mental Health Condition      | 4141 (2.6)                           | 276 (1.5)                       | < .001  |
| Tuberculosis Form            |                                      |                                 | < .001  |
| Pulmonary                    | 132705 (82.6)                        | 16921 (95.1)                    |         |
| Extrapulmonary               | 22834 (14.2)                         | 667 (3.8)                       |         |
| Extrapulmonary and Pulmonary | 5189 (3.2)                           | 188 (1.1)                       |         |
| Treatment Outcome            |                                      |                                 | < .001  |
| Cure                         | 120632 (75.1)                        | 14606 (82.2)                    |         |
| Lost to Follow-up            | 16748 (10.4)                         | 1513 (8.5)                      |         |
| Death by TB                  | 5553 (3.5)                           | 161 (0.9)                       |         |
| Death by Other Cause         | 7946 (4.9)                           | 229 (1.3)                       |         |
| Transfer                     | 8045 (5.0)                           | 1169 (6.6)                      |         |
| MDR-TB                       | 661 (0.4)                            | 69 (0.4)                        |         |
| Change in Treatment regimen  | 986 (0.6)                            | 26 (0.1)                        |         |
| Therapeutic Failure          | 117 (0.1)                            | 3 (0.02)                        |         |

365 **Table 2.** Adjusted odds ratios for treatment success among all newly diagnosed tuberculosis  
 366 cases using mixed-effects multivariable regression.

|                                 | aOR <sup>1</sup> | 95% CI      |
|---------------------------------|------------------|-------------|
| Incarceration                   | 1.27             | 1.19 - 1.34 |
| Directly Observed Therapy (DOT) | 2.17             | 2.11 - 2.22 |
| Incarceration*DOT <sup>2</sup>  | 1.18             | 1.08 - 1.28 |
| Male sex                        | 0.83             | 0.81 - 0.85 |
| Age, years                      |                  |             |
| 18-25                           | Ref              | Ref         |
| 26-45                           | 1.12             | 1.08 - 1.16 |
| 46-65                           | 1.19             | 1.15 - 1.24 |
| > 65                            | 0.71             | 0.68 - 0.75 |
| Self-Identified Race            |                  |             |
| white                           | Ref              | Ref         |
| black                           | 0.80             | 0.75 - 0.84 |
| Asian                           | 0.83             | 0.73 - 0.94 |
| brown/mixed Race                | 0.81             | 0.79 - 0.84 |
| indigenous                      | 0.96             | 0.85 - 1.09 |
| Education                       |                  |             |
| Less than 5th Grade             | Ref              | Ref         |
| 5th - 8th Completed             | 1.04             | 1.01 - 1.07 |
| Greater than 8th Completed      | 1.57             | 1.53 - 1.62 |
| Year of Diagnosis               |                  |             |
| 2015                            | Ref              | Ref         |
| 2016                            | 1.03             | 1.00 - 1.06 |
| 2017                            | 0.95             | 0.93 - 0.98 |
| Comorbidities                   |                  |             |
| HIV Positive                    | 0.33             | 0.32 - 0.34 |
| Alcohol Use Disorder            | 0.55             | 0.54 - 0.57 |
| Diabetes                        | 1.04             | 1.00 - 1.08 |
| Mental Health Condition         | 0.73             | 0.69 - 0.78 |
| Tuberculosis Form               |                  |             |
| Pulmonary                       | Ref              | Ref         |
| Extrapulmonary                  | 1.06             | 1.02 - 1.09 |
| Extrapulmonary and Pulmonary    | 0.79             | 0.74 - 0.84 |

<sup>1</sup> aOR = Adjusted odds ratio

<sup>2</sup> Incarceration\*DOT indicates the use of an interaction term

367

368 **Table 3. Factors associated with treatment success among incarcerated individuals in a**  
 369 **multivariable logistic regression model**

|                              | aOR <sup>1</sup> | 95% CI      |
|------------------------------|------------------|-------------|
| Directly Observed Therapy    | 2.50             | 2.31 - 2.71 |
| Male sex                     | 1.23             | 1.01-1.49   |
| Age, years                   |                  |             |
| 18-25                        | Ref              | Ref         |
| 26-45                        | 1.10             | 1.01 - 1.19 |
| 46-65                        | 0.97             | 0.81 - 1.14 |
| > 65                         | 0.46             | 0.33 - 0.65 |
| Self-Identified Race         |                  |             |
| white                        | Ref              | Ref         |
| black                        | 0.83             | 0.72 - 0.94 |
| Asian                        | 0.69             | 0.45 - 1.05 |
| brown/mixed Race             | 0.75             | 0.69 - 0.82 |
| indigenous                   | 0.49             | 0.29 - 0.82 |
| Education                    |                  |             |
| Less than 5th Grade          | Ref              | Ref         |
| 5th - 8th Completed          | 1.31             | 1.20 - 1.44 |
| Greater than 8th Completed   | 1.77             | 1.58 - 1.97 |
| Year of Diagnosis            |                  |             |
| 2015                         | Ref              | Ref         |
| 2016                         | 1.06             | 0.96 - 1.18 |
| 2017                         | 1.02             | 0.93 - 1.13 |
| Comorbidities                |                  |             |
| HIV Positive                 | 0.39             | 0.34 - 0.45 |
| Alcohol Use Disorder         | 0.63             | 0.57 - 0.70 |
| Diabetes                     | 0.97             | 0.72 - 1.30 |
| Mental Health Condition      | 0.60             | 0.46 - 0.80 |
| Tuberculosis Form            |                  |             |
| Pulmonary                    | Ref              | Ref         |
| Extrapulmonary               | 0.80             | 0.66 - 0.97 |
| Extrapulmonary and Pulmonary | 0.58             | 0.42 - 0.80 |

370

<sup>1</sup> aOR = adjusted odds ratio

371

372 **Figure Legends:**

373

374 **Figure 1. Predicted Probabilities of Treatment Success Among Incarcerated Individuals**  
375 **from the Incarcerated Multivariable Model Stratified by DOT Status.** Facets indicate risk  
376 factors, points indicate mean predicted probability of treatment success, whiskers indicate  
377 interquartile ranges, and color indicates DOT treatment status.

378

379 **Figure 2. Percentage of the Incarcerated Tuberculosis Patients without DOT by State from**  
380 **2015 to 2017.** Darker colors indicate an increasing percentage of incarcerated tuberculosis  
381 patients without DOT.

382

383

384 **Figure 1**  
385

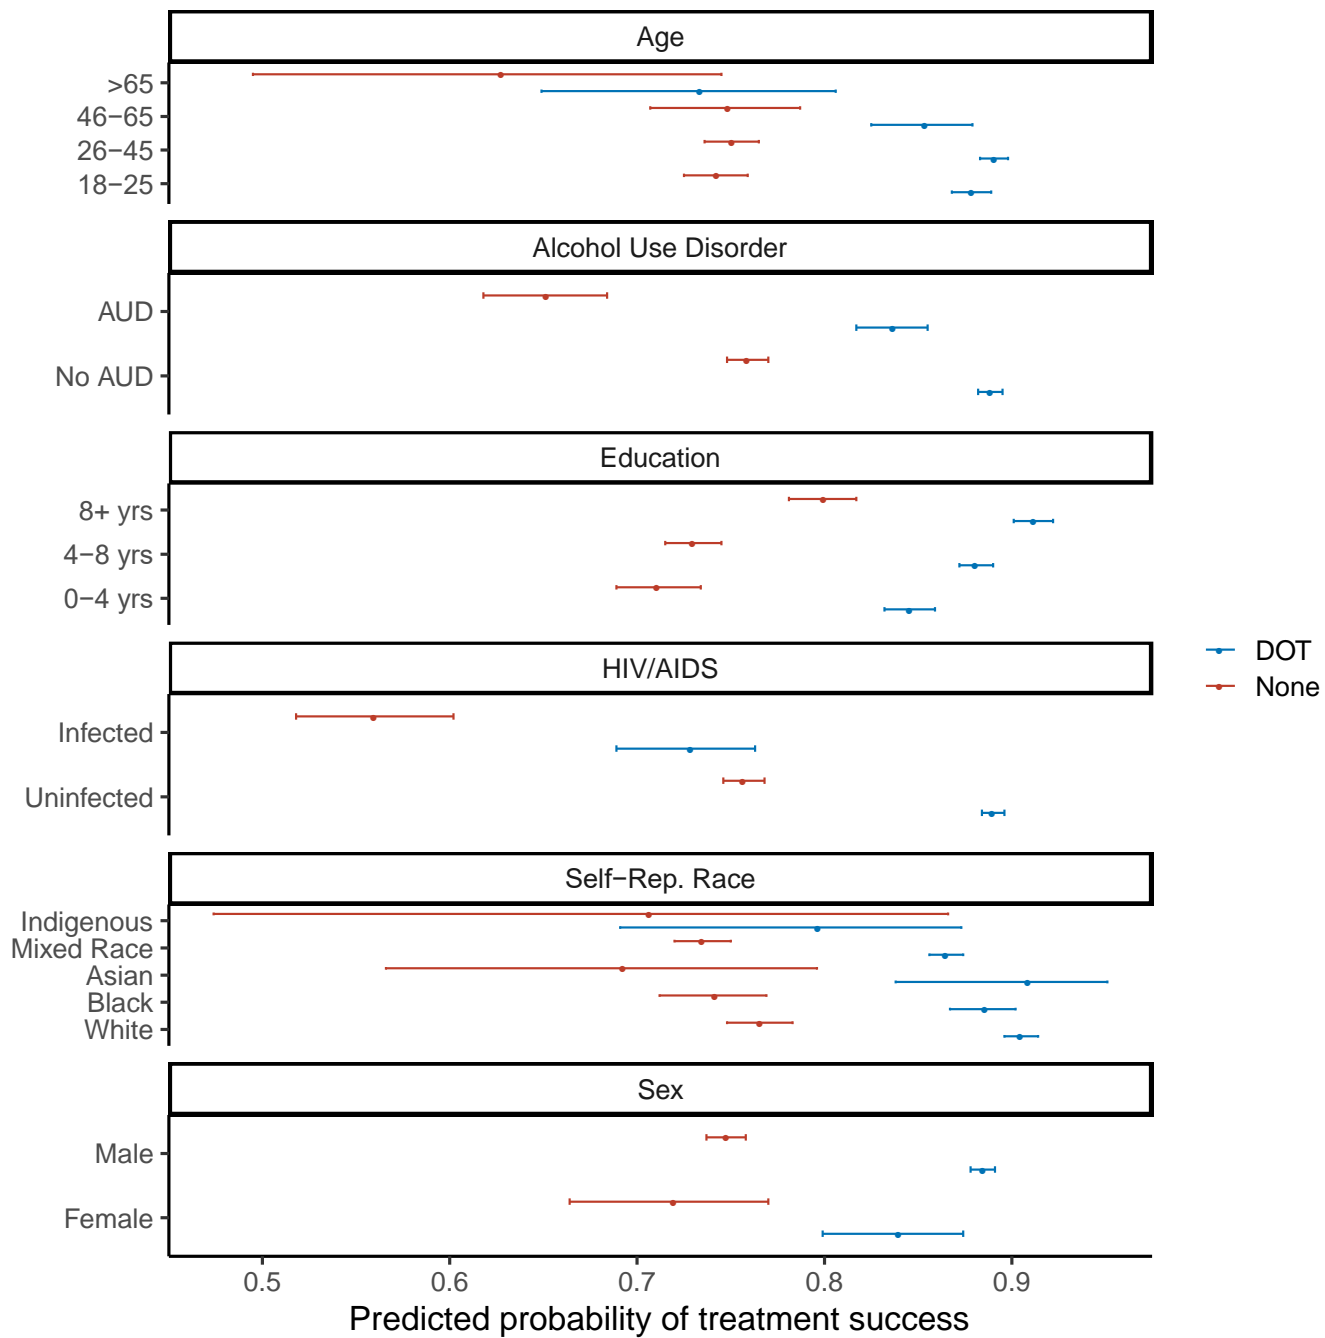

386  
387  
388

389 **Figure 2**  
390

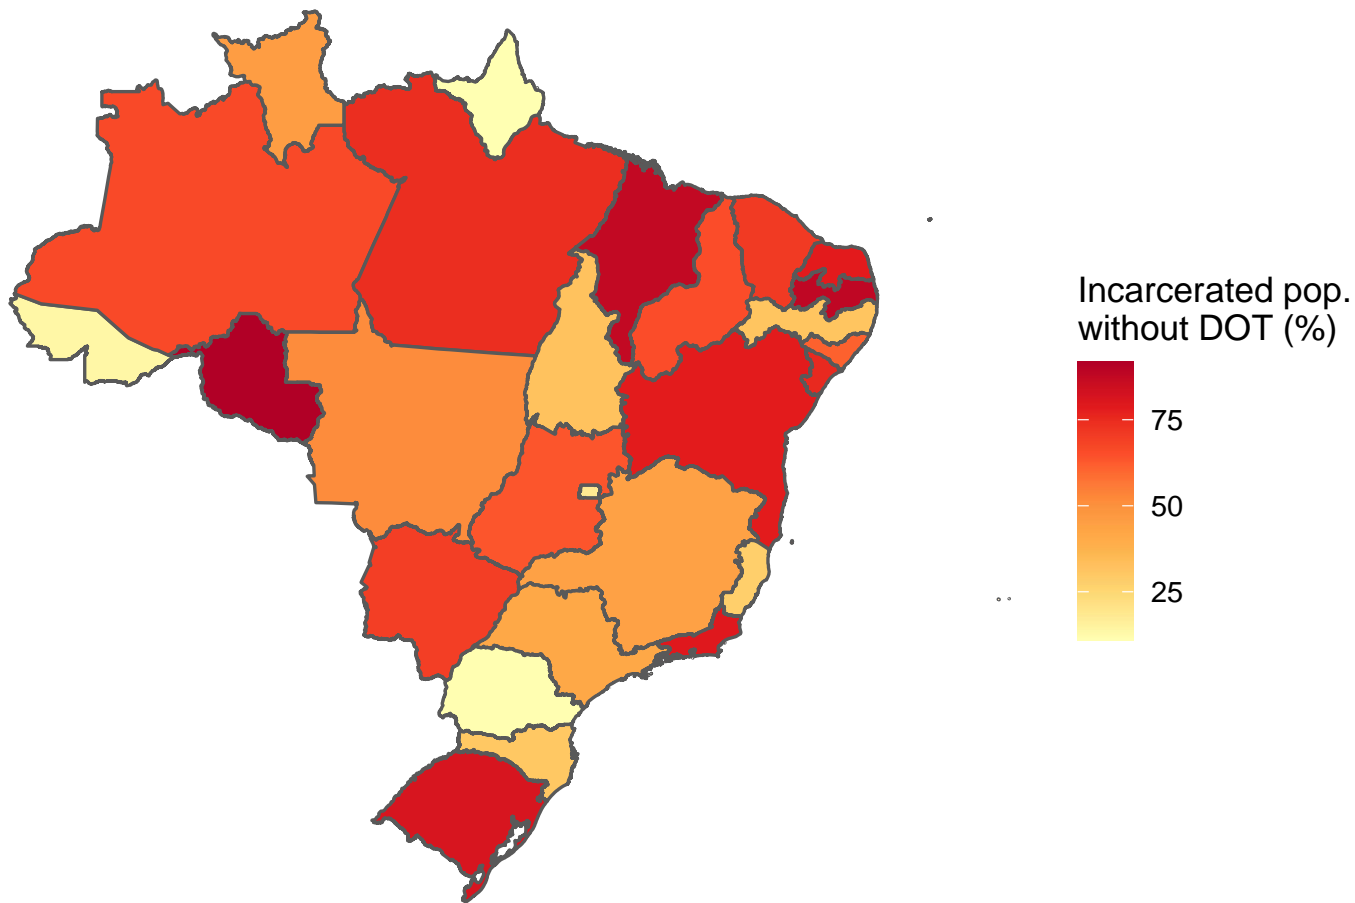

Source: https://medrxiv.org/content/10.1101/2021.07.31.21261427v1.full.pdf
